# Supplementary material
Source: MDPI journal article supplement (https://www.mdpi.com/2071-1050/14/16/10225)
Supplement: s1 [file s1 › sustainability-1831458-supplementary.pdf]

## Supplementary Materials

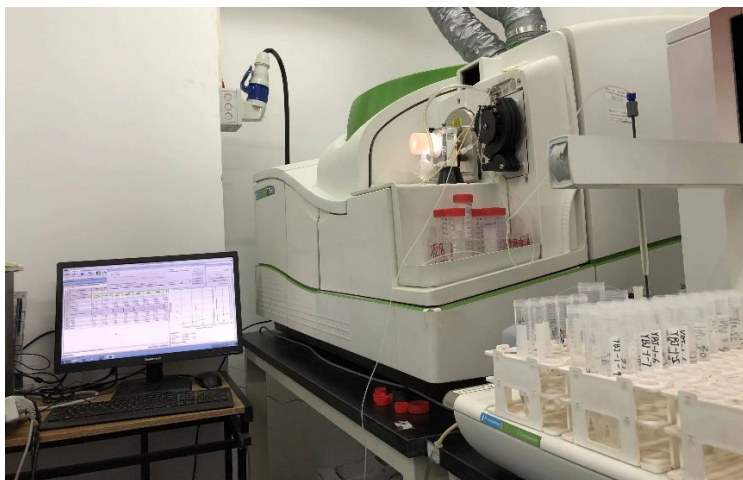

Figure S1. The image of Plasma-Mass Spectrometer (ICP-MS, NexION 350D, PerkinElmer, USA)

Table S1. The values of the exposure parameters

| Parameter         | Reference value      |       | Unit                    | Reference |
|-------------------|----------------------|-------|-------------------------|-----------|
|                   | Adult                | Child |                         |           |
| IR                | 0.37                 | 0.21  | kg/day                  | [1]       |
| EF                | 350                  | 350   | day/year                | [2]       |
| BW                | 63                   | 29    | kg                      | [3]       |
| I <sub>ng</sub> R | 100                  | 200   | mg/day                  | [4]       |
| SA                | 5700                 | 2800  | cm <sup>2</sup>         | [5]       |
| AF                | 0.07                 | 0.2   | mg/cm <sup>2</sup> /day | [6]       |
| ABS               | 0.001 (As: 0.03)     |       | -                       | [4]       |
| I <sub>nh</sub> R | 16                   | 7.6   | m <sup>3</sup> /day     | [8]       |
| PEF               | 1.36×10 <sup>9</sup> |       | m <sup>3</sup> /kg      | [6]       |

Table S2. Reference values of RfD and CSF of heavy metals through different exposure pathways

| Heavy metal | RfD (mg/kg/day)    |                       |                       | CSF (mg/kg/day) <sup>-1</sup> |                 |            |
|-------------|--------------------|-----------------------|-----------------------|-------------------------------|-----------------|------------|
|             | Oral ingestion     | Dermal contact        | Inhalation            | Oral ingestion                | Dermal exposure | Inhalation |
| Cr          | 1.5 <sup>a</sup>   | 6×10 <sup>-5</sup>    | 2.86×10 <sup>-5</sup> | -                             | -               | -          |
| Ni          | 2×10 <sup>-2</sup> | 5.4×10 <sup>-3</sup>  | 2.06×10 <sup>-2</sup> | -                             | -               | -          |
| Cu          | 4×10 <sup>-2</sup> | 1.2×10 <sup>-2</sup>  | 4.02×10 <sup>-2</sup> | -                             | -               | -          |
| As          | 3×10 <sup>-4</sup> | 1.23×10 <sup>-4</sup> | 3×10 <sup>-4</sup>    | 1.5, 25.7 <sup>b</sup>        | 3.66            | 15.1       |

|    |                      |                       |                       |                      |   |     |
|----|----------------------|-----------------------|-----------------------|----------------------|---|-----|
| Cd | $1 \times 10^{-3}$   | $1 \times 10^{-5}$    | $1 \times 10^{-3}$    | -                    | - | 6.3 |
| Pb | $3.5 \times 10^{-3}$ | $5.25 \times 10^{-4}$ | $3.52 \times 10^{-3}$ | $8.5 \times 10^{-3}$ | - | -   |

Note: The reference values were obtained from U.S. Environmental Protection Agency [9-15].

a - Cr mainly exists in the forms of Cr(III) and Cr(VI), and Cr(VI) will be rapidly reduced to Cr(III) by human gastric juice. Therefore, the *RfD* value of Cr(III) was chosen to calculate HQ instead of total chromium in the study.

b – The CSF value of  $1.5 \text{ (mg/kg/day)}^{-1}$  for i-As corresponds to skin cancer, while the CSF value of  $25.7 \text{ (mg/kg/day)}^{-1}$  is used for bladder and lung cancer.

### References:

1. Fang, Y.; Bai, G.; Xiang, X.; He, Y.; Yang, X., The characteristics of grain consumption among Chinese urban and rural residents: 2010-2012 *Acta Nutrimenta Sinica (in Chinese)* **2019**, (1), 5-9.
2. USEPA, Risk Assessment Guidance for Superfund: Volume I: Human Health Evaluation Manual (Part A). Office of Solid Waste and Emergency Response. In US Environmental Protection Agency: Washington, DC, USA, 1989.
3. SEPAC, Exposure Factors Handbook of Chinese Population. In China Environmental Science Press: Beijing, China, 2013.
4. USEPA, Exposure Factors Handbook (Final Report). In US Environmental Protection Agency: Washington, DC, USA, 2011.
5. USEPA, Risk Assessment Guidance for Superfund: Volume I: Human Health Evaluation Manual. In Office of Superfund Remediation and Technology Innovation: Washington, DC, USA, 2004.
6. USEPA, Supplemental Guidance for Developing Soil Screening Levels for Superfund Sites. In US Environmental Protection Agency: Washington, DC, USA, 2002.
7. Chabukdhara, M.; Nema, A. K., Heavy metals assessment in urban soil around industrial clusters in Ghaziabad, India: probabilistic health risk approach. *Ecotoxicology and environmental safety* **2013**, 87, 57-64.
8. Integrated Risk Information System *Nickel, soluble salts; CASRN Various*, U.S. Environmental Protection Agency: Washington, DC, USA, 1987.
9. Integrated Risk Information System, Chromium(III), insoluble salts; CASRN 16065-83-1. In U.S. Environmental Protection Agency: Washington, DC, USA, 1987.
10. Integrated Risk Information System, Cadmium; CASRN 7440-43-9. In U.S. Environmental Protection Agency: Washington, DC, USA, 1987.
11. Integrated Risk Information System, Copper; CASRN 7440-50-8. In U.S. Environmental Protection Agency: Washington, DC, USA, 1988.
12. Integrated Risk Information System *Arsenic, inorganic; CASRN 7440-38-2*; USEPA: Washington, DC, USA, 1988.
13. Integrated Risk Information System, *Lead and compounds (inorganic); CASRN 7439-92-1*. U.S. Environmental Protection Agency: Washington, DC, USA, 1998; p 13-15.
14. U.S. Environmental Protection Agency, *IRIS Toxicological Review of Inorganic Arsenic (Cancer) (2010 External Review Draft)*, EPA/635/R-10/001. U.S. Environmental Protection Agency: Washington, DC, 2010.
